# Supplementary material
Source: HighWire-hosted journal article supplement (https://jnm.snmjournals.org/highwire/filestream/94480/field_highwire_adjunct_files/0/118877_Supplemental_Data.pdf)
Supplement: 118877_Supplemental_Data.pdf [file 118877_Supplemental_Data.pdf]

## Supplemental Data

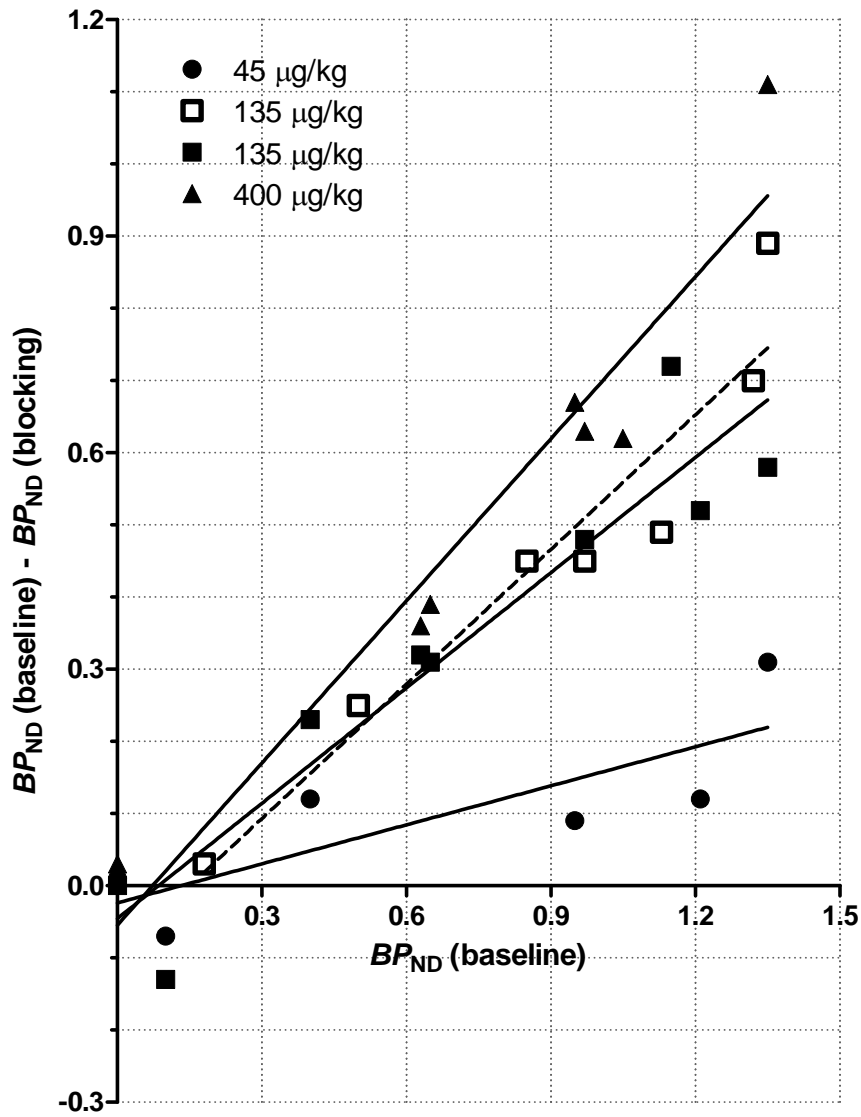

**Supplemental Figure 1.** Modified Lassen plot of [<sup>11</sup>C]carfentanil PET data. Nucleus accumbens region was excluded because it lies distant from the line of regression. Filled-black point means same monkey.

**Supplemental Table 1.** Estimated parameters of one- and two-site binding model. Each region's specific binding at KOR ( $BP_{ND}^{KOR}$ ) and MOR ( $BP_{ND}^{MOR}$ ) and shared the effective doses of LY2795050 to achieve 50 % occupancy at KOR ( $ED_{50}^{KOR}$ ) and MOR ( $ED_{50}^{MOR}$ ) are shown

Two-site binding model

|                 | caudate                                                                             | cingulate        | globus pallidus | putamen         | nucleus accumbens | substantia nigra | frontal cortex  | insula           |
|-----------------|-------------------------------------------------------------------------------------|------------------|-----------------|-----------------|-------------------|------------------|-----------------|------------------|
| $BP_{ND}^{KOR}$ | $0.48 \pm 0.18$                                                                     | $0.87 \pm 0.23$  | $1.00 \pm 0.21$ | $0.28 \pm 0.21$ | $0.89 \pm 0.21$   | $0.54 \pm 0.18$  | $0.42 \pm 0.21$ | $0.58 \pm 0.23$  |
| $BP_{ND}^{MOR}$ | $0.07 \pm 0.16$                                                                     | $-0.01 \pm 0.22$ | $0.07 \pm 0.21$ | $0.27 \pm 0.19$ | $0.11 \pm 0.20$   | $0.15 \pm 0.16$  | $0.03 \pm 0.19$ | $-0.05 \pm 0.21$ |
| $ED_{50}^{KOR}$ | $12.93 \pm 4.54$                                                                    |                  |                 |                 |                   |                  |                 |                  |
| Constraints     | $ED_{50}^{KOR}ED_{50}^{KOR} > 0.0$ and shared, $ED_{50}^{MOR}ED_{50}^{MOR} = 119.2$ |                  |                 |                 |                   |                  |                 |                  |

(Estimate  $\pm$  S.E.)

One-site binding model

|                 | caudate                                       | cingulate       | globus pallidus | putamen         | nucleus accumbens | substantia nigra | frontal cortex  | insula          |
|-----------------|-----------------------------------------------|-----------------|-----------------|-----------------|-------------------|------------------|-----------------|-----------------|
| $BP_{ND}^{KOR}$ | $0.55 \pm 0.04$                               | $0.85 \pm 0.04$ | $1.10 \pm 0.04$ | $0.58 \pm 0.04$ | $0.99 \pm 0.04$   | $0.71 \pm 0.04$  | $0.44 \pm 0.04$ | $0.51 \pm 0.04$ |
| $ED_{50}^{KOR}$ | $15.63 \pm 2.24$                              |                 |                 |                 |                   |                  |                 |                 |
| Constraints     | $ED_{50}^{KOR}ED_{50}^{KOR} > 0.0$ and shared |                 |                 |                 |                   |                  |                 |                 |

(Estimate  $\pm$  S.E.)
